# Supplementary material
Source: MDPI journal article supplement (https://www.mdpi.com/2072-6694/14/22/5526)
Supplement: s1 [file s1]

Dear editor,

Thank you for your careful check. I'll present the information you asked in the attachment as follows.

1. For Western blot figures, experiments were conducted 3 times at least, I put the raw pictures of Figure 2(d), 2h and supplementary figure 1d in below. The relative grayscale value of each band relative to actin obtained by using Image J was also showed. The relative protein expression of LRRC8A in PAAD cell lines in Figure 2(d) was based on their relative grayscale value.

- a. Protein expression of LRRC8A in HPCY5, ASPC-1, PANC1, BXPC-3, ASPC-1<sup>GEM-R</sup>, ASPC-1<sup>GEM-R</sup> cells (Left) and protein expression of ACTIN in HPCY5, ASPC-1, PANC1, BXPC-3, ASPC-1<sup>GEM-R</sup>, ASPC-1<sup>GEM-R</sup> cells (Right).

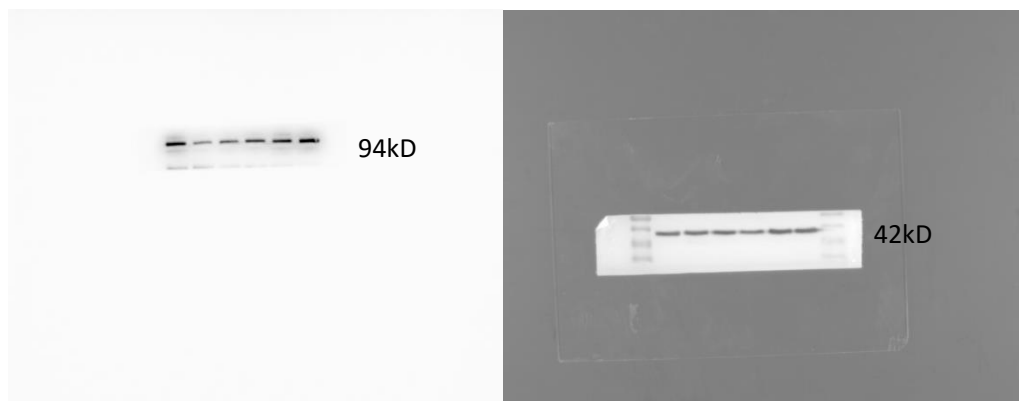

- b. Protein expression of LRRC8A in HPCY5, , ASPC-1, PANC1, BXPC-3, ASPC-1<sup>GEM-R</sup> cells (Left) and protein expression of ACTIN in HPCY5, ASPC-1, PANC1, BXPC-3, ASPC-1<sup>GEM-R</sup> cells (Right).

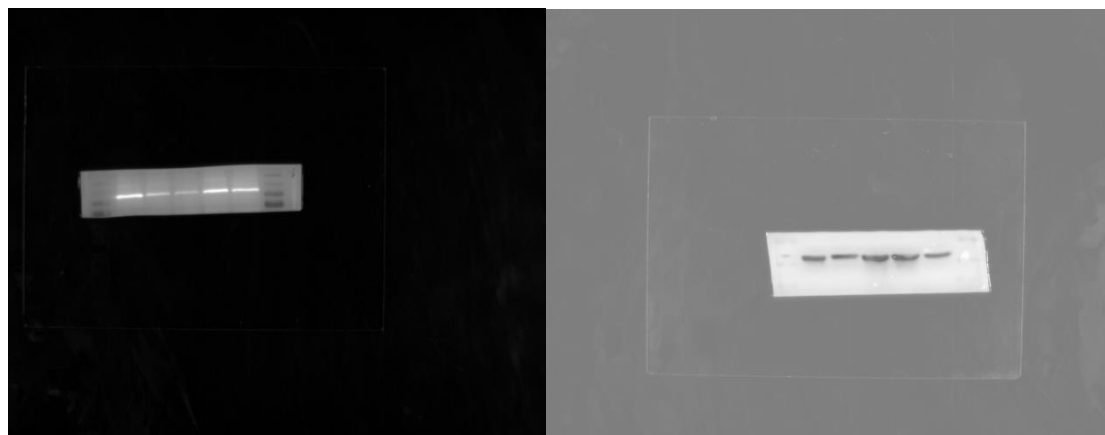

- c. Protein expression of LRRC8A in ASPC-1 and ASPC-1<sup>GEM-R</sup> cells (Left) and protein expression of ACTIN in ASPC-1 and ASPC-1<sup>GEM-R</sup> cells (Right).

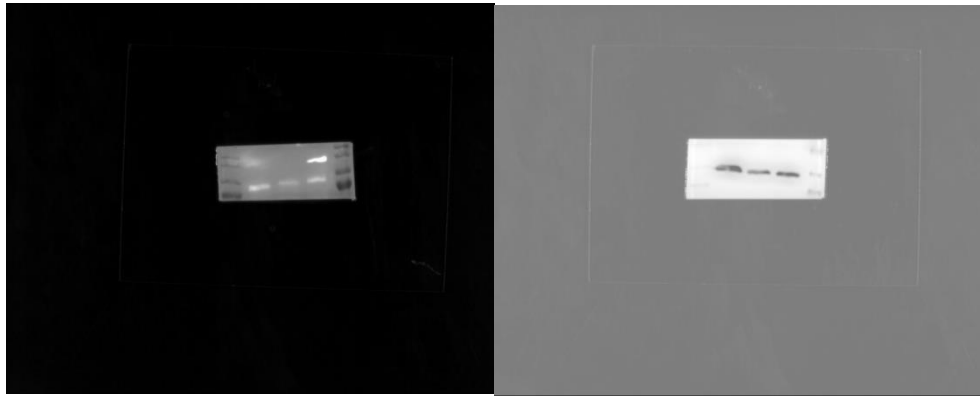

- d. Protein expression of LRRC8A in BXPC-3, ASPC-1 and PANC1 cells and (Left) and protein expression of ACTIN in BXPC-3, ASPC-1 and PANC1 cells.

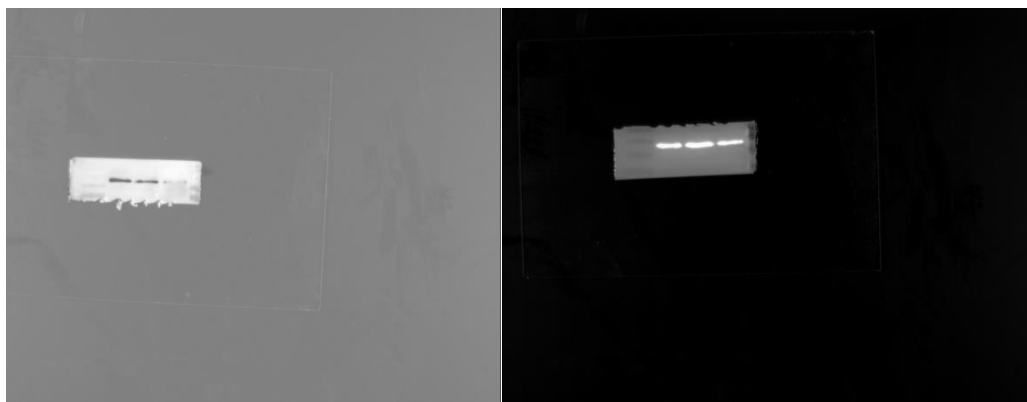

The relative grayscale value of each band (ASPC-1, PANC1, BXPC-3, ASPC-1<sup>GEM-R</sup>) relative to actin is listed in below.

| ASPC1   | PANC1   | BXPC3   | ASPC1 <sup>GEM-R</sup> |
|---------|---------|---------|------------------------|
| 0.57652 | 0.46321 | 0.97696 | 0.887790               |
| 1.37580 | 1.02821 | 2.74920 | 2.028100               |

- e. Typical protein expression of LRRC8A in ASPC-1<sup>GEM-R</sup> cells and ASPC-1<sup>GEM-R</sup> cells infected with shLRRC8A (left), ASPC-1 cells, ASPC-1 cells infected with shLRRC8A, BXPC-3, BXPC-3 cells infected with shLRRC8A (right) in Figure 2h..

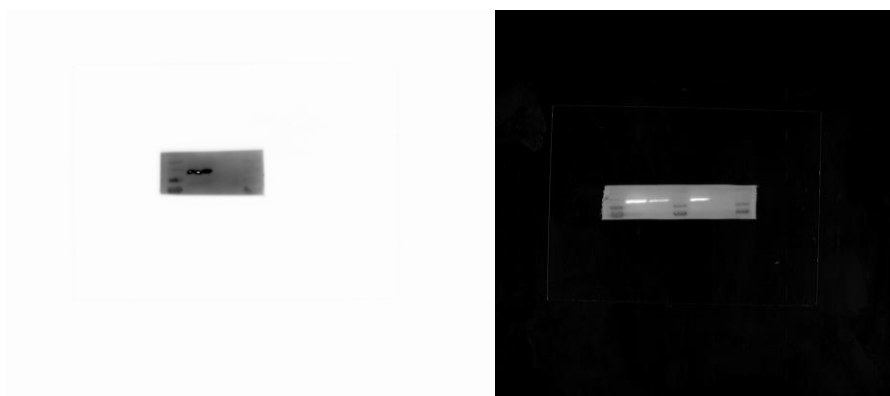

- f. Typical protein expression of MMP2 in ASPC-1<sup>GEM-R</sup> cells and ASPC-1<sup>GEM-R</sup> cells infected with shLRRC8A in Figure 2h.

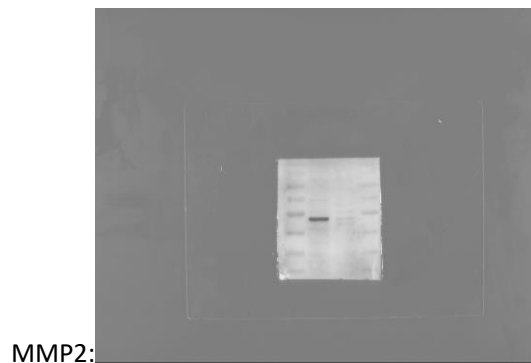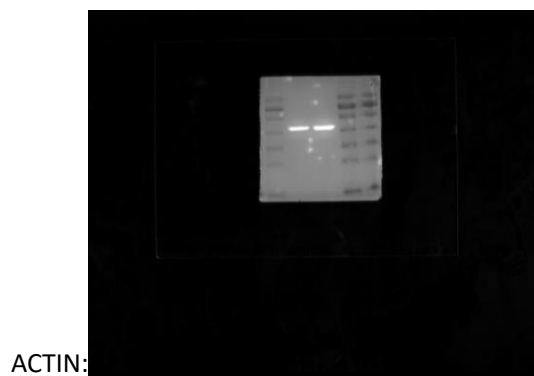

- g. Typical protein expression of MMP2 in ASPC-1 cells and ASPC-1 cells infected with shLRRC8A in Figure 2h.

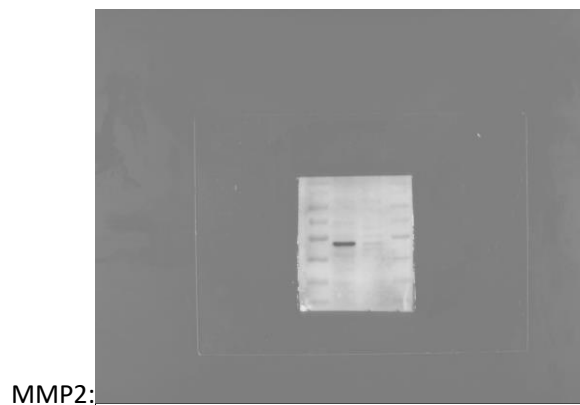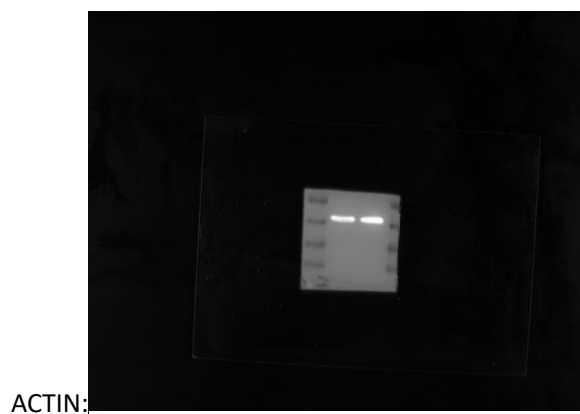

- h. Typical protein expression of MMP2 in BXP-3 and BXP-3 cells infected with

shLRRC8A in Figure 2h.

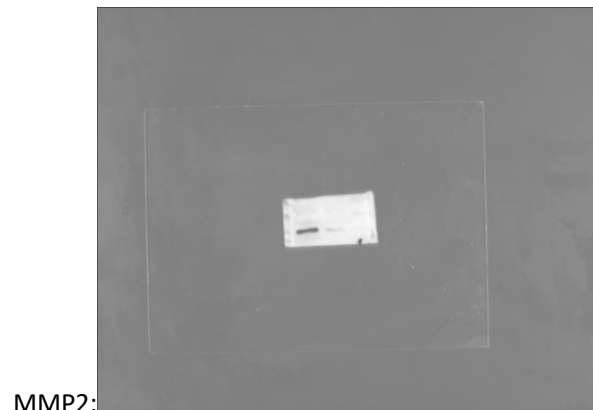

MMP2:

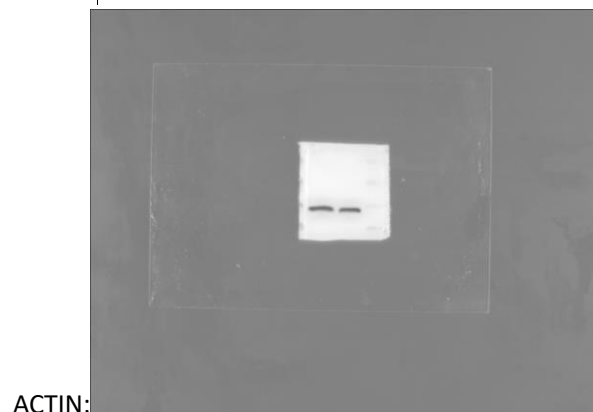

ACTIN:

- i. Typical protein expression of MMP2 in ASPC-1<sup>GEM-R</sup> cells and ASPC-1<sup>GEM-R</sup> cells treated with GEM or DCPIB+GEM in supplementary figure 1d.

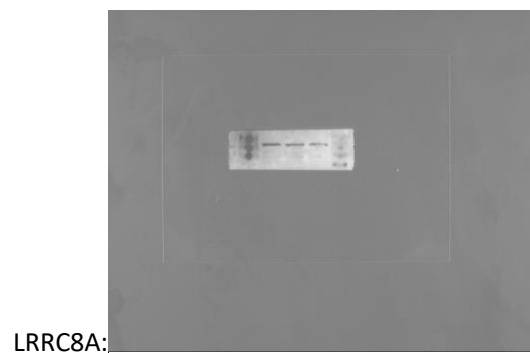

LRRC8A:

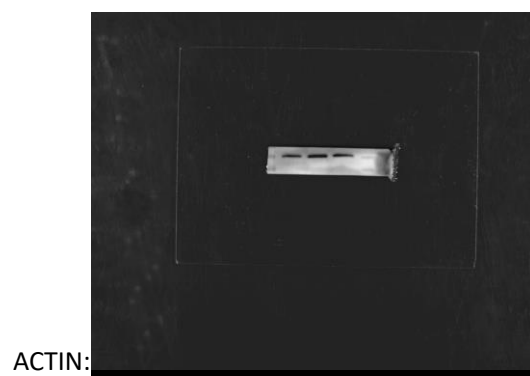

ACTIN:
